# Supplementary material for: Spinocerebellar ataxia in the Bouvier des Ardennes breed is caused by a KCNJ10 missense variant
Source: PubMed Central journal article supplement — J Vet Intern Med. 2022 Nov 25;37(1):216–22. doi: 10.1111/jvim.16594 (PMC9889618; doi:10.1111/jvim.16594), 2022-11-25
Supplement: JVIM-37-216-s002.pdf [file JVIM-37-216-s002.pdf]

| ANTIBODY                            | SOURCE                                               | HOST SPECIES      | PRE-TREATMENT                  | DILUTION |
|-------------------------------------|------------------------------------------------------|-------------------|--------------------------------|----------|
| GFAP                                | Agilent DAKO, Z0334, CA, USA                         | Polyclonal Rabbit | HIER citrate buffer 0.01M pH 6 | 1/5000   |
| Iba1                                | Abcam plc, ab5076, Cambridge, UK                     | Polyclonal Goat   | HIER citrate buffer 0.01M pH 6 | 1/300    |
| NF200 (phos. & non-phos.) Clone N62 | Merck KGaA, N142 (Sigma-Aldrich), Darmstadt, Germany | Monoclonal Mouse  | HIER citrate buffer 0.01M pH 6 | 1/5000   |
